# Supplementary material for: A 2001–2022 global gross primary productivity dataset using an ensemble model based on the random forest method
Source: Copernicus journal article supplement (doi:10.5194/bg-21-4285-2024), 2024-10-02
Supplement: Supplementary file 1 [file bg-21-4285-2024-supplement.pdf]

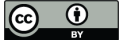

*Supplement of*

## **A 2001–2022 global gross primary productivity dataset using an ensemble model based on the random forest method**

**Xin Chen et al.**

*Correspondence to:* Tiexi Chen (txchen@nuist.edu.cn)

The copyright of individual parts of the supplement might differ from the article licence.

26 **Table S1.** Overview of flux sites from ChinaFlux used in this study

| ID | Latitude | Longitude | Vegetation type | Study period | References         |
|----|----------|-----------|-----------------|--------------|--------------------|
| 1  | 23.1737  | 112.5344  | EBF             | 2003-2010    | Li et al., 2021    |
| 2  | 30.85    | 91.0833   | GRA             | 2004-2010    | Chai et al., 2021  |
| 3  | 31.8068  | 119.2173  | CRO             | 2015-2018    | Zhou et al., 2023  |
| 4  | 32.8     | 102.55    | GRA             | 2015-2018    | Chen et al., 2023  |
| 5  | 33.4997  | 111.9353  | DBF             | 2017-2018    | Niu et al., 2023   |
| 6  | 35.2531  | 100.6992  | GRA             | 2012-2016    | He et al., 2023    |
| 7  | 37.6094  | 101.3119  | GRA             | 2004-2009    | Zhang et al., 2021 |
| 8  | 41.1481  | 121.2017  | CRO             | 2005-2014    | Zhang et al., 2023 |
| 9  | 41.644   | 110.3315  | GRA             | 2015-2018    | Song et al., 2023  |
| 10 | 42.4025  | 128.0958  | DBF             | 2003-2010    | Wu et al., 2021    |
| 11 | 43.3255  | 116.4032  | GRA             | 2003-2010    | Hao et al., 2020   |
| 12 | 45.4167  | 127.6678  | DBF             | 2016-2018    | Wang et al., 2021  |

27

28 **Table S2.** Parameters for Revise-EC-LUE

|                         | DBF   | ENF   | EBF   | MF    | GRA   | CRO-C3 | CRO-C4 | SAV   | SHR   | WET   |
|-------------------------|-------|-------|-------|-------|-------|--------|--------|-------|-------|-------|
| $\epsilon_{\text{sun}}$ | 1.52  | 2.50  | 1.96  | 1.82  | 1.79  | 1.77   | 2.90   | 1.74  | 1.27  | 1.30  |
| $\epsilon_{\text{sha}}$ | 3.64  | 4.52  | 3.33  | 3.31  | 3.72  | 3.82   | 3.47   | 4.00  | 3.61  | 3.27  |
| $\theta$                | 29.74 | 32.71 | 32.13 | 32.72 | 31.15 | 30.43  | 19.69  | 28.87 | 31.37 | 32.08 |
| VPD0                    | 16.29 | 8.86  | 10.36 | 12.14 | 10.52 | 14.20  | 15.75  | 14.21 | 8.29  | 15.78 |

29

30

31 **Table S3.** Parameters for EC-LUE

|            | DBF  | ENF  | EBF  | MF   | GRA  | CRO-C3 | CRO-C4 | SAV  | SHR  | WET  |
|------------|------|------|------|------|------|--------|--------|------|------|------|
| $\epsilon$ | 2.40 | 2.84 | 2.71 | 2.31 | 2.43 | 2.30   | 3.08   | 2.30 | 1.80 | 1.82 |

|          |       |       |       |       |       |       |       |       |       |       |
|----------|-------|-------|-------|-------|-------|-------|-------|-------|-------|-------|
| $\theta$ | 33.08 | 34.23 | 29.52 | 31.49 | 28.96 | 32.84 | 30.29 | 31.80 | 30.04 | 30.19 |
| VPD0     | 15.89 | 8.28  | 8.99  | 12.56 | 10.55 | 12.76 | 16.21 | 12.42 | 9.40  | 16.79 |

32 **Table S4.** Parameters for kNDVI-GPP

|        | Formula                            |
|--------|------------------------------------|
| DBF    | $GPP = kNDVI \times 325.68 - 0.21$ |
| ENF    | $GPP = kNDVI \times 625.01 + 0.24$ |
| EBF    | $GPP = kNDVI \times 190.38 + 4.17$ |
| MF     | $GPP = kNDVI \times 341.14 + 0.52$ |
| GRA    | $GPP = kNDVI \times 302.9 + 0.14$  |
| CRO-C3 | $GPP = kNDVI \times 334.42 - 0.71$ |
| CRO-C4 | $GPP = kNDVI \times 584.7 - 0.93$  |
| SAV    | $GPP = kNDVI \times 451.23 + 0.03$ |
| SHR    | $GPP = kNDVI \times 422.21 + 0.14$ |
| WET    | $GPP = kNDVI \times 281.09 + 0.38$ |

33

34

35

36 **Table S5.** Parameters for NIRv-GPP

|        | Formula                          |
|--------|----------------------------------|
| DBF    | $GPP = 39.31 \times NIRv - 1.83$ |
| ENF    | $GPP = 47.08 \times NIRv - 0.77$ |
| EBF    | $GPP = 25.56 \times NIRv + 2.17$ |
| MF     | $GPP = 37.65 \times NIRv - 1.19$ |
| GRA    | $GPP = 33.53 \times NIRv - 0.54$ |
| CRO-C3 | $GPP = 36.94 \times NIRv - 1.55$ |
| CRO-C4 | $GPP = 59.61 \times NIRv - 1.29$ |
| SAV    | $GPP = 44.92 \times NIRv - 1.13$ |
| SHR    | $GPP = 24.28 \times NIRv - 0.06$ |

$$\text{WET} \quad \left| \quad \text{GPP} = 28.01 \times \text{NIR}_v - 0.06 \right.$$

37 **Table S6.** Parameters for VPM

|            | DBF   | ENF   | EBF   | MF    | GRA   | CRO-C3 | CRO-C4 | SAV   | SHR   | WET   |
|------------|-------|-------|-------|-------|-------|--------|--------|-------|-------|-------|
| $\epsilon$ | 1.92  | 3.28  | 2.82  | 2.38  | 2.06  | 2.03   | 2.73   | 2.15  | 1.92  | 1.78  |
| Tmax       | 40.10 | 40.43 | 42.46 | 40.48 | 41.63 | 42.18  | 41.15  | 41.88 | 41.34 | 40.67 |
| Tmin       | -1.76 | -3.85 | -2.16 | -3.45 | -3.28 | -2.92  | -0.85  | -3.32 | -1.64 | -3.18 |
| Topt       | 17.19 | 15.99 | 15.97 | 16.26 | 15.32 | 16.40  | 23.74  | 21.73 | 16.51 | 19.54 |

38

39

40 **Table S7.** Parameters for MODIS

|            | DBF    | ENF   | EBF    | MF     | GRA    | CRO-C3 | CRO-C4 | SAV   | SHR   | WET   |
|------------|--------|-------|--------|--------|--------|--------|--------|-------|-------|-------|
| $\epsilon$ | 1.54   | 1.35  | 1.46   | 1.44   | 1.39   | 1.50   | 1.98   | 1.52  | 0.80  | 1.15  |
| Tmax       | 10.45  | 7.41  | 8.10   | 9.33   | 10.54  | 10.84  | 10.92  | 13.56 | 7.37  | 11.79 |
| Tmin       | -10.39 | -9.84 | -10.26 | -12.03 | -11.22 | -12.32 | -13.21 | -6.82 | -8.34 | -9.44 |
| VPDmax     | 17.81  | 45.54 | 29.98  | 24.67  | 52.08  | 42.70  | 43.14  | 30.89 | 46.10 | 52.95 |
| VPDmin     | 7.93   | 4.36  | 3.91   | 5.57   | 4.74   | 5.06   | 7.89   | 5.73  | 3.82  | 6.83  |

41

42 **Table S8.** Effect of the number of GPP estimate models in the ERF model on model  
43 performance

| Number of GPP models | 2           | 3           | 4           | 5           |
|----------------------|-------------|-------------|-------------|-------------|
| R <sup>2</sup>       | 0.793±0.024 | 0.824±0.011 | 0.836±0.004 | 0.845±0.001 |
| RMSE                 | 1.798±0.104 | 1.658±0.052 | 1.600±0.022 | 1.556±0.009 |
| Sim/Obs              | 1±0.001     | 0.999±0.000 | 1±0.000     | 1±0.000     |

44

45 **Text S1.** Detailed description of six GPP estimate models

46 1.1 EC-LUE

47 EC-LUE is a type of light use efficiency model developed by Yuan et al.  
48 (2007). The original model was driven by the normalized vegetation index (NDVI),  
49 photosynthetically active radiation (PAR), air temperature and the Bowen ratio of  
50 sensible latent heat flux. The Bowen ratio of sensible latent heat flux was replaced by  
51 VPD to characterize the constraints of atmospheric drought later, and the effect of  
52 CO<sub>2</sub> on GPP was integrated at the same time (Yuan et al., 2019). The basic form is as  
53 follows

54 
$$GPP = PAR \times FPAR \times \varepsilon \times Cs \times \min(Ts, Ws) \quad (1)$$

55 Where FPAR is the ratio of canopy absorption PAR,  $\varepsilon$  is the maximum light  
56 use efficiency. Cs, Ts and Ws represent the influences of CO<sub>2</sub>, temperature and VPD,  
57 respectively:

58 
$$Cs = \frac{Ci - \theta}{Ci + 2\theta} \quad (2)$$

59 
$$Ts = \frac{(Ta - 0) \times (Ta - 40)}{(Ta - 0) \times (Ta - 40) - (Ta - 20.33) \times (Ta - 20.33)} \quad (3)$$

60 
$$Ws = \frac{VPD0}{VPD + VPD0} \quad (4)$$

61 In these formulas, Ci and  $\theta$  respectively represent the leaf internal CO<sub>2</sub>  
62 concentration and the CO<sub>2</sub> compensation point during no-dark respiration. Ta is the  
63 air temperature, and VPD0 is the empirical coefficient. In this model,  $\theta$ ,  $\varepsilon$  and VPD0  
64 need to be calibrated using GPP observations of flux towers.

65 1.2 Revised-EC-LUE

66 Different from the commonly used light use efficiency model,  
67 Revised-EC-LUE divides the canopy into sunlit and shaded leaves, and its  
68 effectiveness has been proved in several flux sites. The basic form is as follows:

69 
$$GPP = (\varepsilon_{sun} \times APAR_{sun} + \varepsilon_{sha} \times APAR_{sha}) \times Cs \times \min(Ts, Ws) \quad (5)$$

70 Where  $\varepsilon_{\text{sun}}$  and  $\varepsilon_{\text{sha}}$  represent the maximum light use efficiency of sunlit  
 71 and shaded leaves respectively,  $\text{APAR}_{\text{sun}}$  and  $\text{APAR}_{\text{sha}}$  represent the PAR absorbed  
 72 by sunlit and shaded leaves respectively. All the processes can refer to the article of  
 73 Zheng et al. (2020),  $C_s$ ,  $T_s$  and  $W_s$  represent the influences of  $\text{CO}_2$ , temperature and  
 74 VPD respectively, and their basic forms are the same as formula (2) - (4). Therefore,  
 75 the parameters to be calibrated in this model include  $\varepsilon_{\text{sun}}$ ,  $\varepsilon_{\text{sha}}$ ,  $\theta$ , and  $\text{VPD}_0$ .

### 76 1.3 NIRv-GPP

77 Near-infrared Vegetation Index (NIRv) proposed by Badgley et al. (2017), is a  
 78 new vegetation index that approximates the proportion of near-infrared light reflected  
 79 by vegetation, it has been shown to be directly related to solar-induced fluorescence  
 80 (SIF) and can be used to estimate GPP. The basic form is as follows

$$81 \quad GPP = a \times \text{NIRv} + b \quad (6)$$

82 Where  $a$  and  $b$  represent the slope and intercept, respectively. NIRv can be  
 83 calculated using satellite-based red band and near infrared band.

$$84 \quad \text{NIRv} = \text{NDVI} \times \text{NIR} = \frac{\text{NIR}-\text{R}}{\text{NIR}+\text{R}} \times \text{NIR} \quad (7)$$

85 Where NIR and R represent red band and near infrared band respectively.

### 86 1.4 kNDVI-GPP

87 Similar to NIRv, kNDVI is a newly proposed vegetation index (Camps-Valls  
 88 et al., 2021). In comparison with GPP and SIF, kNDVI always shows stronger  
 89 correlation than NIRv and NDVI, and has a unique effect in dealing with the  
 90 saturation of the vegetation index. The form is as follows

$$91 \quad GPP = a \times \text{kNDVI} + b \quad (8)$$

92 Where  $a$  and  $b$  represent the slope and intercept, respectively. kNDVI can be  
 93 calculated using satellite-based red band and near infrared band.

$$94 \quad \text{kNDVI} = \tanh \left( \frac{\text{NIR}-\text{R}}{\text{NIR}+\text{R}} \right) \quad (9)$$

95 Where NIR and R represent red band and near infrared band respectively.

## 96 1.5 MODIS

97 MODIS-GPP is one of the light use efficiency models (Running et al., 2004),  
98 driven by FPAR, temperature and VPD, and its basic form is as follows

$$99 \quad GPP = FPAR \times \varepsilon \times T_s \times W_s \quad (10)$$

100 Where  $\varepsilon$  is the maximum light use efficiency.  $T_s$  and  $T_s$  represent the  
101 influences of minimum temperature and VPD, respectively:

$$102 \quad T_s = \frac{TMIN - TMIN_{min}}{TMIN_{max} - TMIN_{min}} \quad (11)$$

$$103 \quad W_s = \frac{VPD_{max} - VPD}{VPD_{max} - VPD_{min}} \quad (12)$$

104 TMINmax and TMINmin are the daily minimum temperature for  $\varepsilon = \varepsilon_{max}$  and  
105  $\varepsilon = 0$ , respectively, and VPDmax and VPDmin are the VPD for  $\varepsilon = 0$  and  $\varepsilon = \varepsilon_{max}$ ,  
106 respectively. In this model,  $\varepsilon$ , TMINmin, TMINmax, VPDmin and VPDmax need to  
107 be calibrated using GPP observations from flux towers.

## 108 1.6 VPM

109 The satellite-based VPM (Xiao et al, 2004) uses the product of light use  
110 efficiency (LUE,  $\varepsilon$ ), temperature constraint ( $T_s$ ), water constraint ( $W_s$ ) and absorbed  
111 photosynthetically active radiation by chlorophyll (APARchl) to estimate GPP as  
112 follows:

$$113 \quad GPP = APAR_{chl} \times \varepsilon \times T_s \times W_s \quad (10)$$

$$114 \quad APAR_{chl} = (EVI - 0.1) \times 1.25 \quad (11)$$

$$115 \quad T_s = \frac{(T_a - T_{max}) \times (T_a - T_{min})}{(T_a - T_{max}) \times (T_a - T_{min}) - (T_a - T_{opt})^2} \quad (12)$$

$$116 \quad W_s = \frac{1 + LSWI}{1 + LSWI_{max}} \quad (13)$$

117 Where the  $T$ ,  $T_{max}$ ,  $T_{min}$  and  $T_{opt}$  refer to the daytime mean temperature,  
118 maximum, minimum, and optimum temperature for photosynthesis, respectively.

119 EVI is the enhanced vegetation index. In this model,  $\epsilon$ ,  $T_{max}$ ,  $T_{min}$  and  $T_{opt}$  need to  
120 be calibrated using GPP observations from flux towers.

121 The LSWI (Land Surface Water Index) is a good indicator of water stress  
122 from the vegetation canopy and soil background. This index is calculated as follows:

123 
$$LSWI = \frac{NIR-SWIR}{NIR+SWIR} \quad (14)$$

124 Where NIR and SWIR represent near infrared band and shortwave infrared  
125 band respectively.

126

127

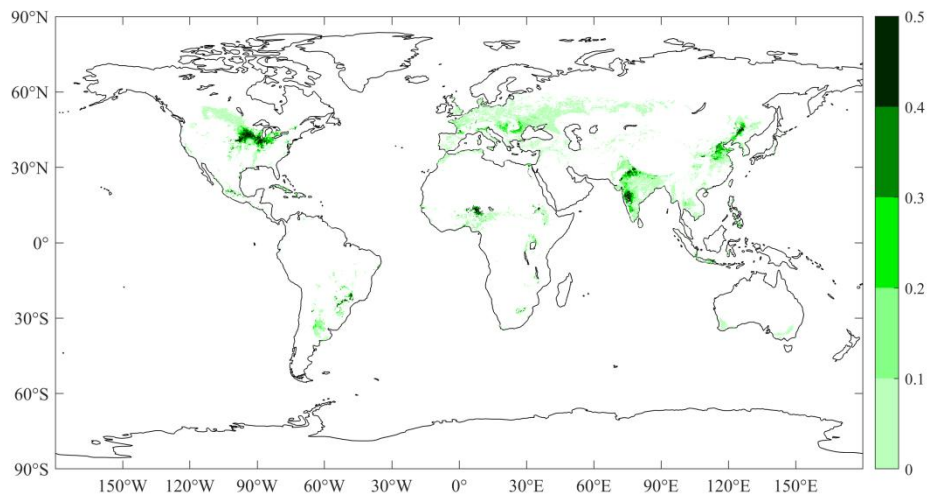

128

129 **Figure S1.** Distribution map of C4 crops.



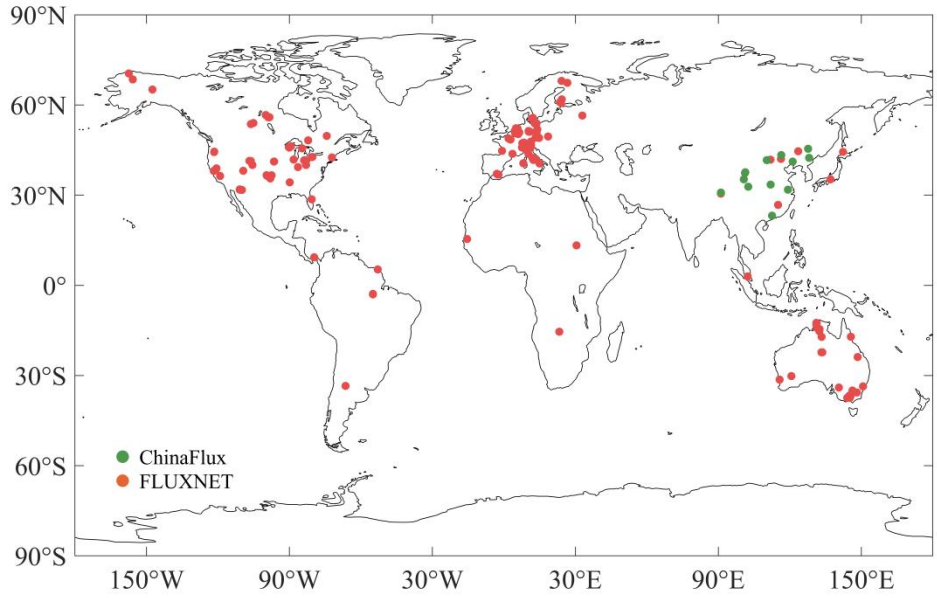

130

131 **Figure S2.** Flux site locations of ChinaFlux and FLUXNET used in this study.

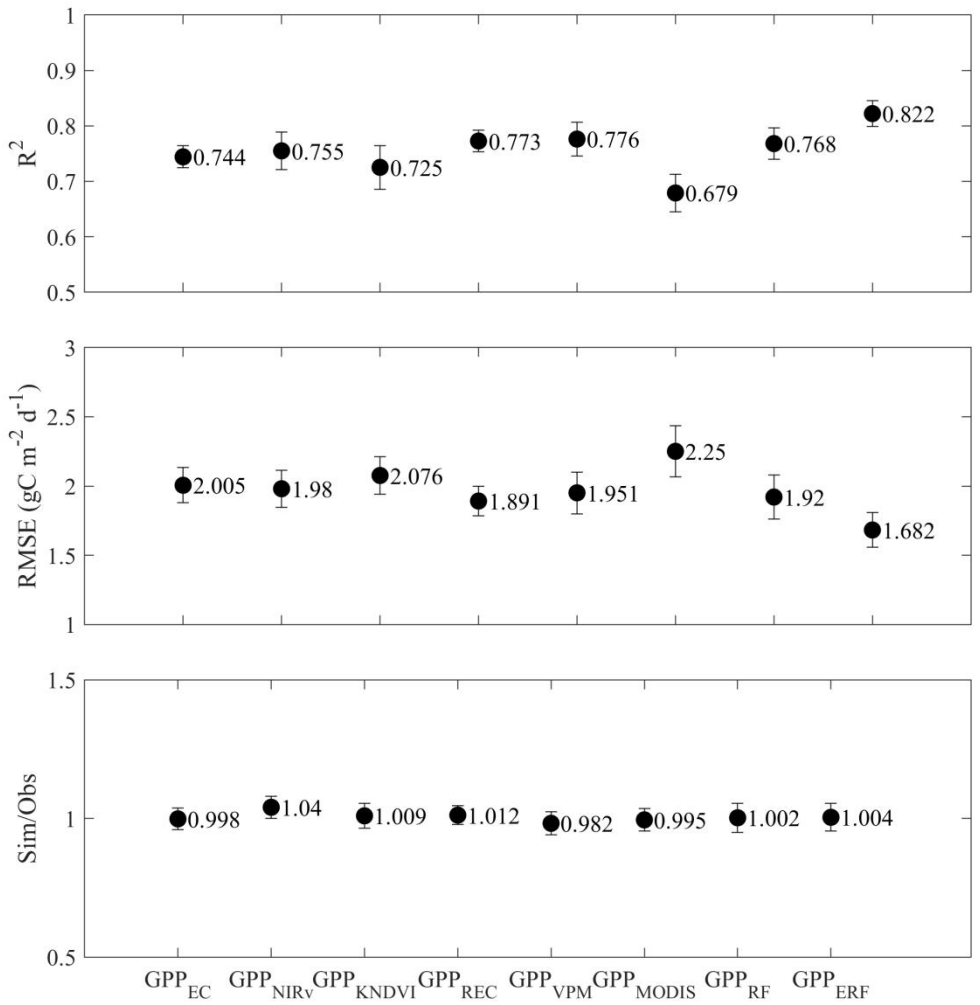

132

133 **Figure S3.** Validation results for each model on all data at 30% of the sites. The black  
 134 dots represent the mean of the 200 validation results, and the upper and lower  
 135 boundaries represent the standard deviation.

136

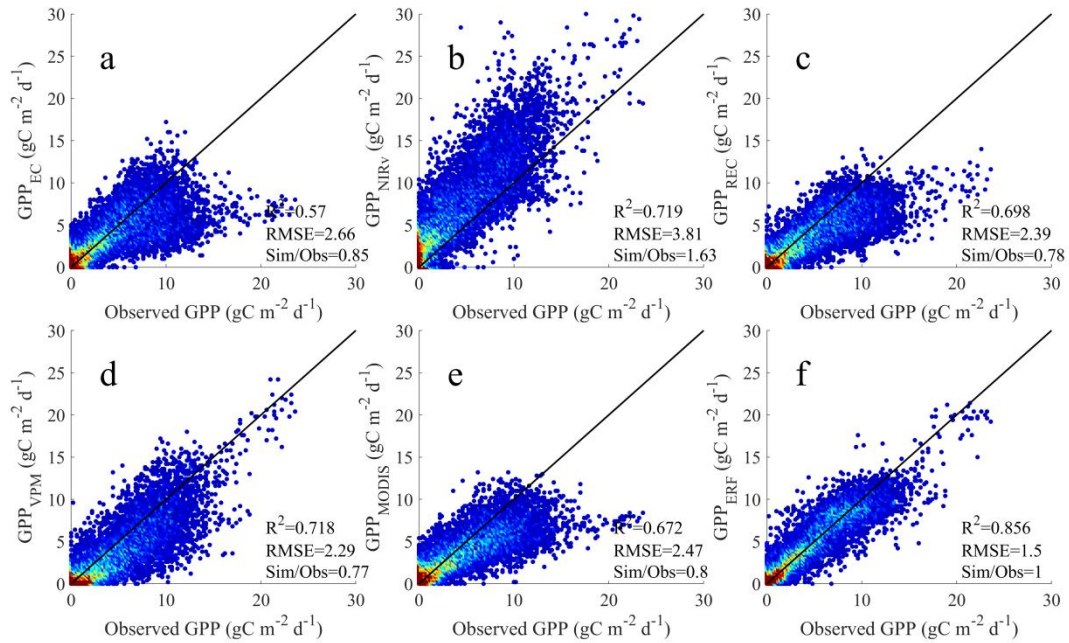

137

138 **Figure S4.** Comparison between the GPP simulations of the six models with original  
 139 parameters and the GPP observations. a-f represents  $GPP_{EC}$ ,  $GPP_{NIRv}$ ,  $GPP_{REC}$ ,  
 140  $GPP_{VPM}$ ,  $GPP_{MODIS}$ ,  $GPP_{ERF}$ , respectively. The author of kNDVI did not provide  
 141 model parameters, so this model was abandoned.

142

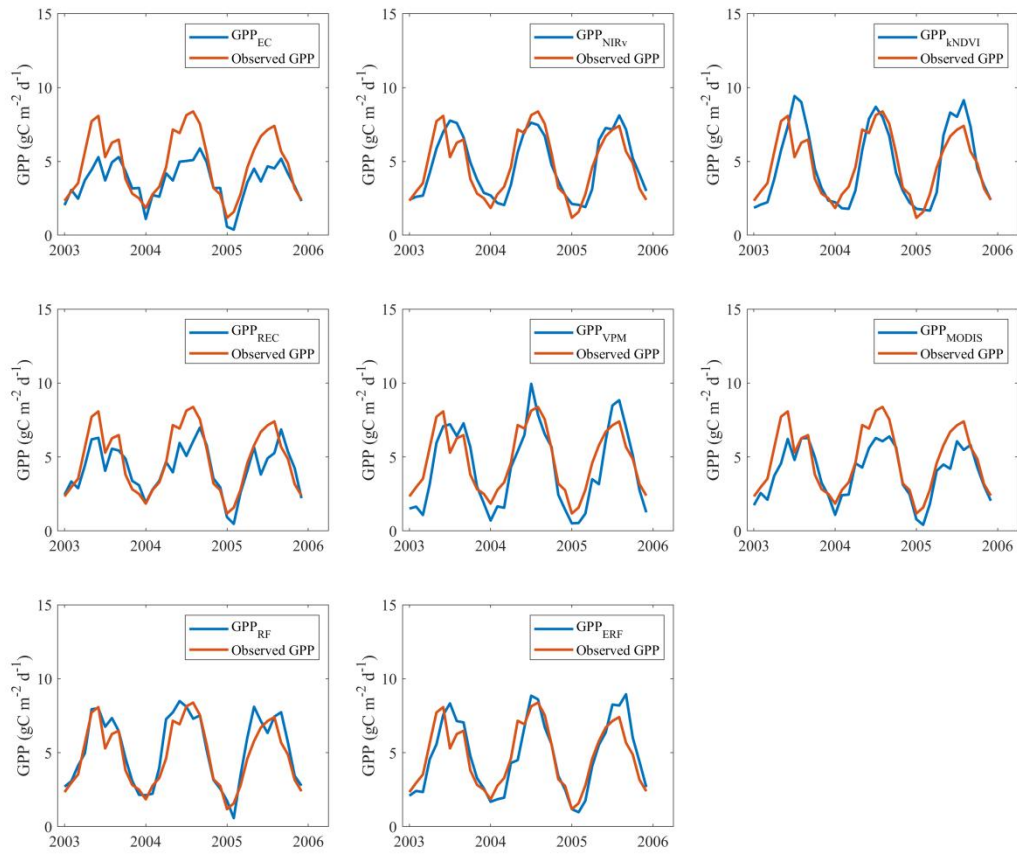

143

144 **Figure S5.** Performance of each GPP estimate model on CN-Qia.

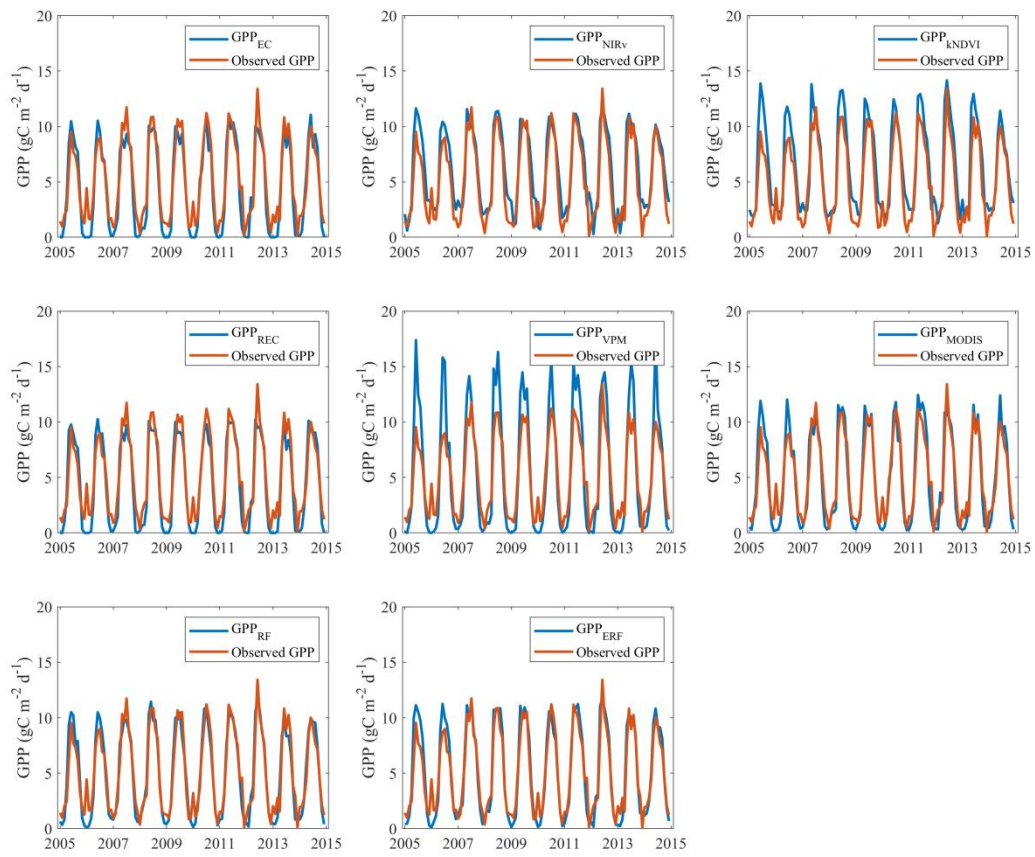

145

146 **Figure S6.** The performance of each GPP estimate model on CH\_Lae.

147

148

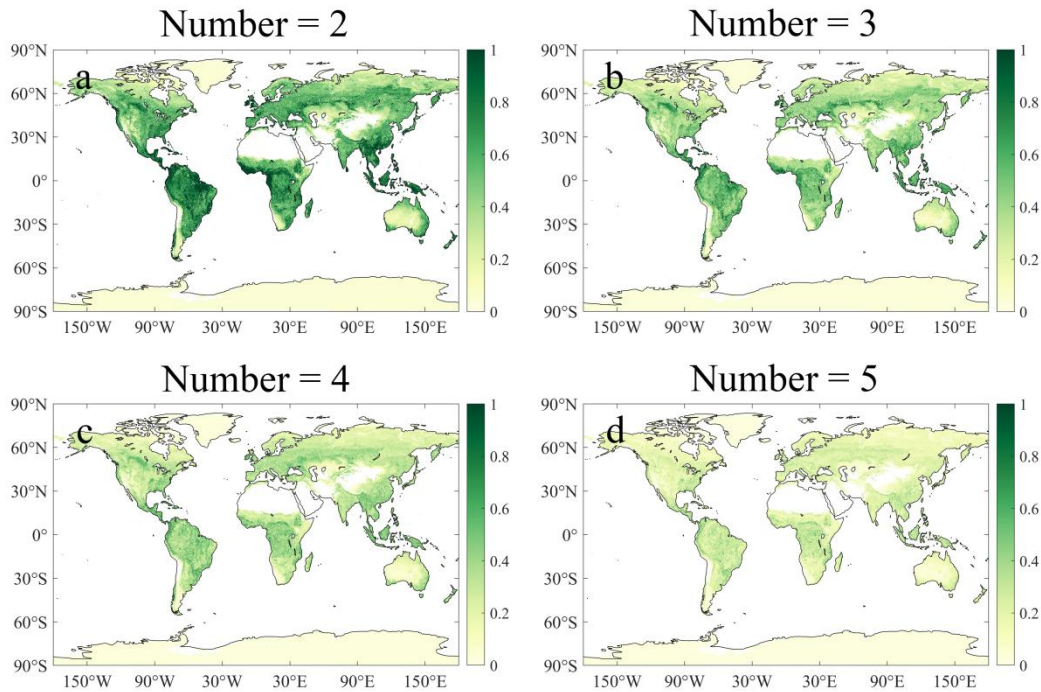

149

150 **Figure S7.** Uncertainty of ERF\_GPP caused by the number of features (simulated  
 151 GPP).

152

153

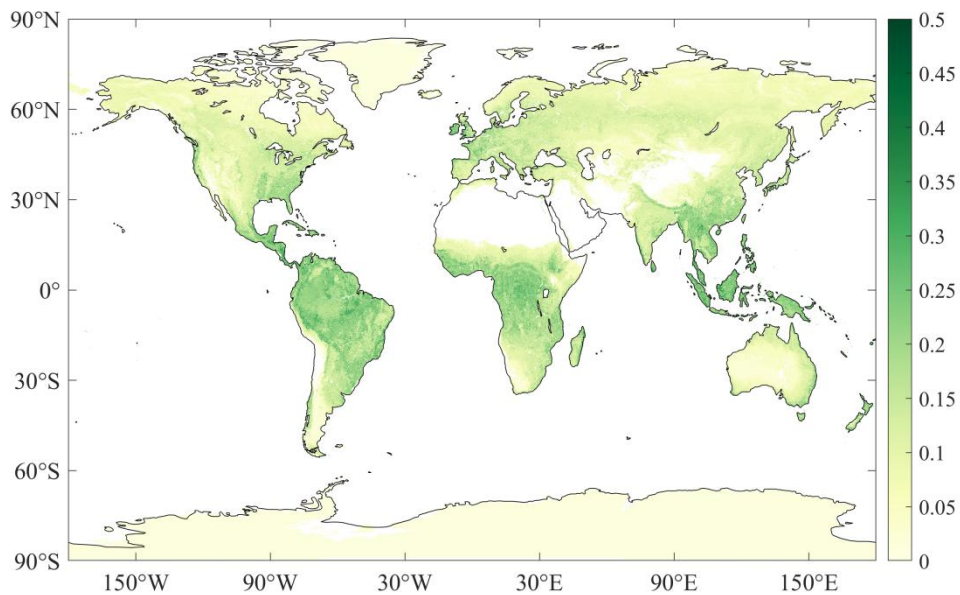

154

155 **Figure S8.** Uncertainty of ERF\_GPP caused by the number of GPP observations.

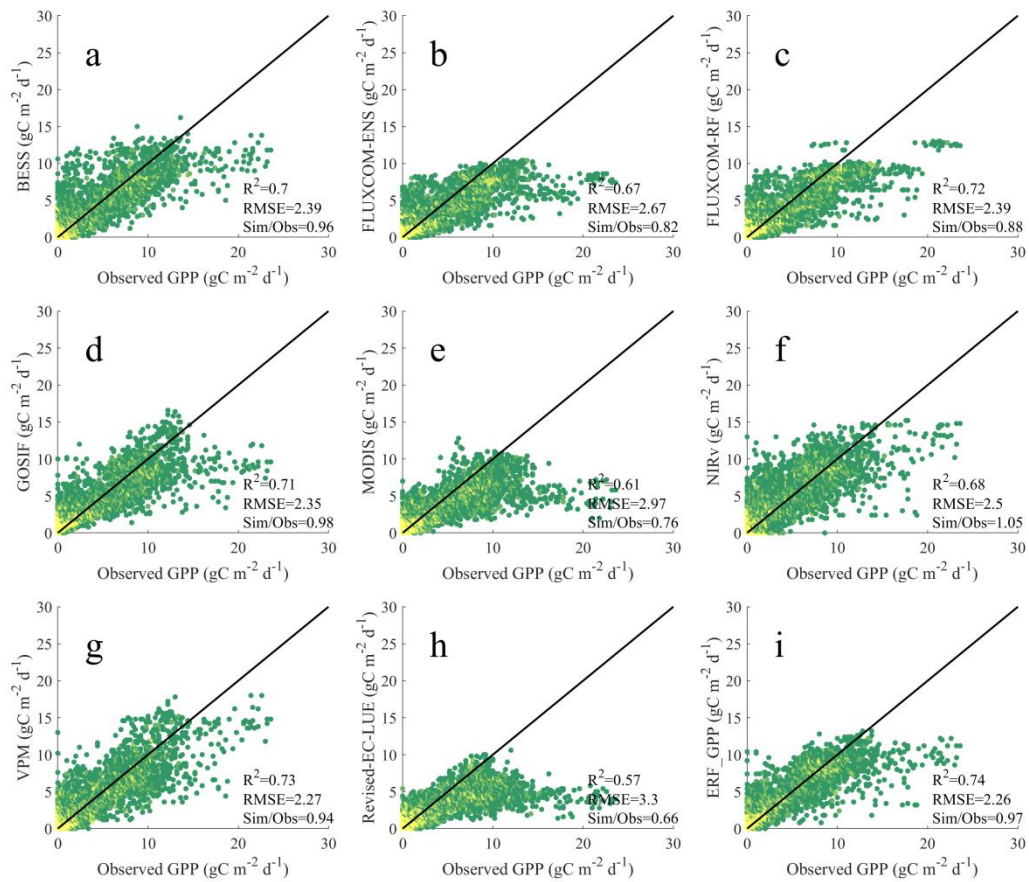

156

157 **Figure S9.** Comparison between the GPP datasets and the GPP observations from  
 158 FLUXNET. a-i represents BESS, FLUXCOM-ENS, FLUXCOM-RF, GOSIF, MODIS,  
 159 NIRv, VPM, Revise-EC-LUE, ERF\_GPP, respectively.

160

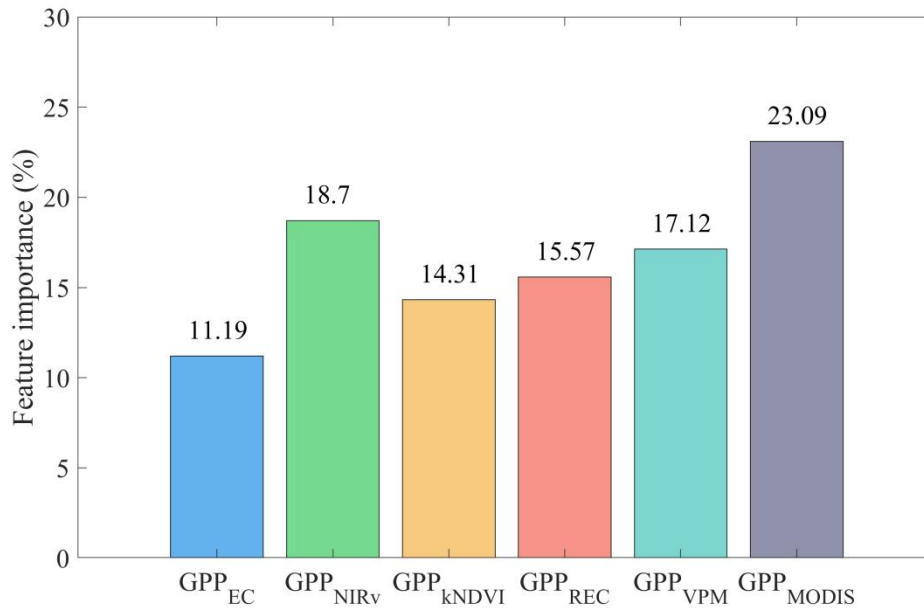

161

162 **Figure S10.** Average of 200 feature importance in the ERF model.

163

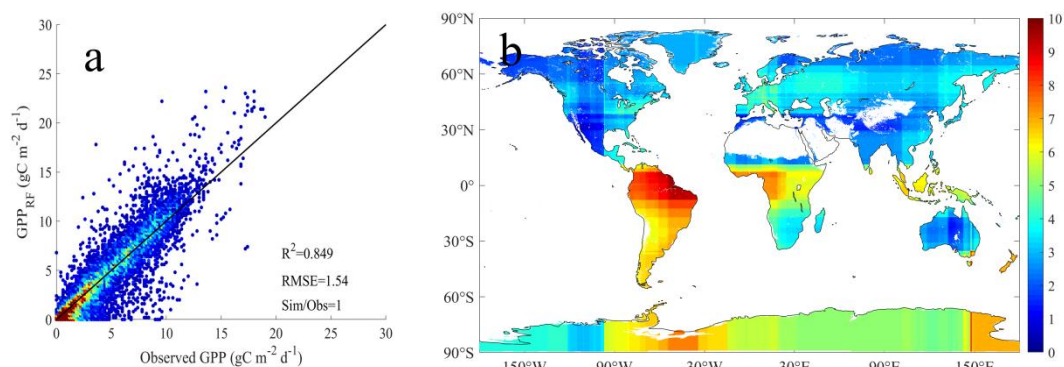

164

165 **Figure S11.** Simulation performance of a random forest model with only longitude,  
 166 latitude, year, and month. a represents the result of the 5-fold-cross-validation, b is the  
 167 multi-year mean estimated by the model for 2001-2022.

168

## 169 Reference

170 Badgley, G., Field, C. B., and Berry, J. A.: Canopy near-infrared reflectance and  
 171 terrestrial photosynthesis, *Science advances*, 3, e1602244,  
 172 <https://doi.org/10.1126/sciadv.1602244>, 2017.

173 Camps-Valls, G., Campos-Taberner, M., Moreno-Martínez, Á., Walther, S., Duveiller,  
 174 G., Cescatti, A., Mahecha, M. D., Muñoz-Marí, J., García-Haro, F. J., Guanter, L.,

175 Jung, M., Gamon, J. A., Reichstein, M., and Running, S. W.: A unified vegetation  
176 index for quantifying the terrestrial biosphere, *Science Advances*, 7, eabc7447,  
177 <https://doi.org/10.1126/sciadv.abc7447>, 2021.

178 Chai X., He Y., Shi P., Zhang X., Niu B., Zhang L., and Chen Z. An observation  
179 dataset of carbon and water fluxes over alpine meadow in Damxung (2004 – 2010).  
180 *China Scientific Data*, 6(1), <https://doi.org/10.11922/csdata.2020.0026.zh>, 2021.

181 Chen, W., Wang, S., and Niu, S. A dataset of carbon, water and heat fluxes of Zoige  
182 alpine meadow from 2015 to 2020. *China Scientific Data*,  
183 <https://doi.org/10.11922/11-6035.csd.2023.0009.zh>, 2023.

184 Hao Y., Zhang L., Sun X., Yu G., Chen Z., and Wang Y. A dataset of carbon and water  
185 fluxes over Xilinhot temperate steppe in Inner Mongolia (2003 – 2010). *China*  
186 *Scientific Data*, <https://doi.org/10.11922/10.11922/csdata.2020.0040.zh>, 2020.

187 He F., Li Q., Chen C., and Zhao L. A dataset of carbon, water and heat fluxes over an  
188 *Elymus nutans* artificial grassland in the Sanjiangyuan Area (2012–2016). *China*  
189 *Scientific Data*, <https://doi.org/10.57760/sciencedb.o00119.00025>, 2023.

190 Li, Y., Yan, J., Meng, Z., Huang, J., Zhang, L., Chen, Z., Liu S., Chu G., Zhang Qi.,  
191 and Zhang, D. An observation dataset of carbon and water fluxes in a mixed  
192 coniferous broad-leaved forest at Dinghushan, Southern China (2003–2010). *China*  
193 *Scientific Data*, 6(1), <https://doi.org/10.11922/csdata.2020.0046.zh>, 2021.

194 Niu, X., Sun, P., Tao, S., Chen, Z., Niu, B., and Liu, S. A dataset of carbon and water  
195 fluxes in a natural oak forest of Baotianman in Henan Province (2017-2018). *China*  
196 *Scientific Data*, <https://doi.org/10.11922/11-6035.csd.2023.0124.zh>, 2023.

197 Running, S. W., Nemani, R. R., Heinsch, F. A., Zhao, M., Reeves, M., and Hashimoto,  
198 H.: A continuous satellite-derived measure of global terrestrial primary production,  
199 *Bioscience*, 54, 547-560,  
200 [https://doi.org/10.1641/0006-3568\(2004\)054\[0547:ACSMOG\]2.0.CO;2](https://doi.org/10.1641/0006-3568(2004)054[0547:ACSMOG]2.0.CO;2), 2004.

201 Song J., Zhou L., Zhou G., Yan Y., and Zhang S. A dataset of carbon and water fluxes  
202 of the temperate desert steppe in Damao Banner, Inner Mongolia (2015–2018). *China*  
203 *Scientific Data*, <https://doi.org/10.11922/11-6035.csd.2023.0021.zh>, 2023.

204 Wang X., Hu K., Liu F., Zhu Y., Zhang Q., and Wang C. A dataset of observed carbon



205 fluxes on deciduous broad-leaved forest at the Maoershan Station from 2016 to 2018.  
206 China Scientific Data, 8(2), <https://doi.org/10.11922/11-6035.csd.2023.0024.zh>, 2023.

207 Wu J., Guan D., Wang A., Yuan F., Diao H., Yu G., Chen Z., and Zhang L. A dataset  
208 of carbon and water flux observation over broad-leaved red pine forest in Changbai  
209 Mountain (2003–2010). China Scientific Data, 6(1),  
210 <https://doi.org/10.11922/csdata.2020.0041.zh>, 2021.

211 Xiao, X., Zhang, Q., Braswell, B., Urbanski, S., Boles, S., Wofsy, S., Moore III, B.,  
212 and Ojima, D.: Modeling gross primary production of temperate deciduous broadleaf  
213 forest using satellite images and climate data, Remote sensing of environment, 91,  
214 256-270, <https://doi.org/10.1016/j.rse.2004.03.010>, 2004.

215 Yuan, W., Liu, S., Zhou, G., Zhou, G., Tieszen, L. L., Baldocchi, D., Bernhofer, C.,  
216 Gholz, H., Goldstein, A. H., Goulden, M. L., Hollinger, D. Y., Hu, Y., Law, B. E., Stoy,  
217 P. C., Vesala, T., and Wofsy, S. C.: Deriving a light use efficiency model from eddy  
218 covariance flux data for predicting daily gross primary production across biomes,  
219 Agricultural and Forest Meteorology, 143, 189-207,  
220 <https://doi.org/10.1016/j.agrformet.2006.12.001>, 2007.

221 Yuan, W., Zheng, Y., Piao, S., Ciais, P., Lombardozzi, D., Wang, Y., Ryu, Y., Chen, G.,  
222 Dong, W., Hu, Z., Jain, A. K., Jiang, C., Kato, E., Li, S., Lienert, S., Liu, S., Nabel, J.  
223 E. M. S., Qin, Z., Quine, T., Sitch, S., Smith, W. K., Wang, F., Wu, C., Xiao, Z., and  
224 Yang, S.: Increased atmospheric vapor pressure deficit reduces global vegetation  
225 growth, Science Advances, 5, eaax1396,  
226 <https://doi.org/10.1016/10.1126/sciadv.aax1396>, 2019.

227 Zhang S., Zhou L., Zhou G., Jia Q., Li R., Wang Y. A dataset of carbon and water flux  
228 observations in the agricultural ecosystem of spring maize in Jinzhou (2005–2014).  
229 China Scientific Data, <https://doi.org/10.11922/11-6035.csd.2023.0007.zh>, 2023.

230 Zhang, F., Li, H., Zhao, L., Zhang, L., Chen, Z., Zhu, J., Xu, S., Yang, Y., Zhao, X.,  
231 Yu, G. and Li, Y. An observation dataset of carbon, water and heat fluxes of alpine  
232 wetland in Haibei (2004–2009). China Scientific Data, 6(1),  
233 <https://doi.org/10.11922/csdata.2020.0033.zh>, 2021.

234 Zheng, Y., Shen, R., Wang, Y., Li, X., Liu, S., Liang, S., Chen, J. M., Ju, W., Zhang, L.,

235 and Yuan, W.: Improved estimate of global gross primary production for reproducing  
236 its long-term variation, 1982–2017, *Earth System Science Data*, 12, 2725-2746,  
237 <https://doi.org/10.5194/essd-12-2725-2020>, 2020.

238 Zhou Y., Zhang Y., Zhu T., and Ju W. A dataset of carbon and water fluxes in the  
239 cropland ecosystem at Jurong Station (2015-2020). *China Scientific Data*, 8(3),  
240 <https://doi.org/10.11922/11-6035.csd.2023.0072.zh>, 2023.

241
